# Supplementary material for: Synthesis and properties of highly branched sulfonated poly(arylene ether)s with flexible alkylsulfonated side chains as proton exchange membranes
Source: Royal Society of Chemistry journal article supplement (doi:10.1039/c5tc04033g), 2016-01-01
Supplement: c5tc04033g1.pdf [file c5tc04033g1.pdf]

## Supporting information

# Synthesis and properties of comb-shaped sulfonated poly(arylene ether)s with highly branched backbones as proton exchange membranes

Dong Liu<sup>a</sup>, Dan Tao<sup>a</sup>, Jiangpeng Ni<sup>a</sup>, Xiongzhi Xiang<sup>a</sup>, Lei Wang<sup>a,\*</sup>, Jingyu Xi<sup>b,\*</sup>

*<sup>a</sup>Shenzhen Key Laboratory of Special Functional Materials, College of Materials Science and Engineering, Shenzhen University, Shenzhen 518060, China*

*<sup>b</sup>Institute of Green Chemistry and Energy, Graduate School at Shenzhen, Tsinghua University, Shenzhen 518055, China*

\*Corresponding author: Lei Wang, E-mail: [wl@szu.edu.cn](mailto:wl@szu.edu.cn) or Jingyu Xi, Email:

[xijy@tsinghua.edu.cn](mailto:xijy@tsinghua.edu.cn)

**Fig. S1.** <sup>1</sup>H NMR spectra of MPAES-8-33

**Fig. S2.** <sup>1</sup>H NMR spectra of HPAES-8-33

**Fig.S3.** <sup>1</sup>H NMR spectra of SPAES-8-33

**Fig.S4.** <sup>1</sup>H NMR spectra of SPAES-0-33 and SPAES-8-33

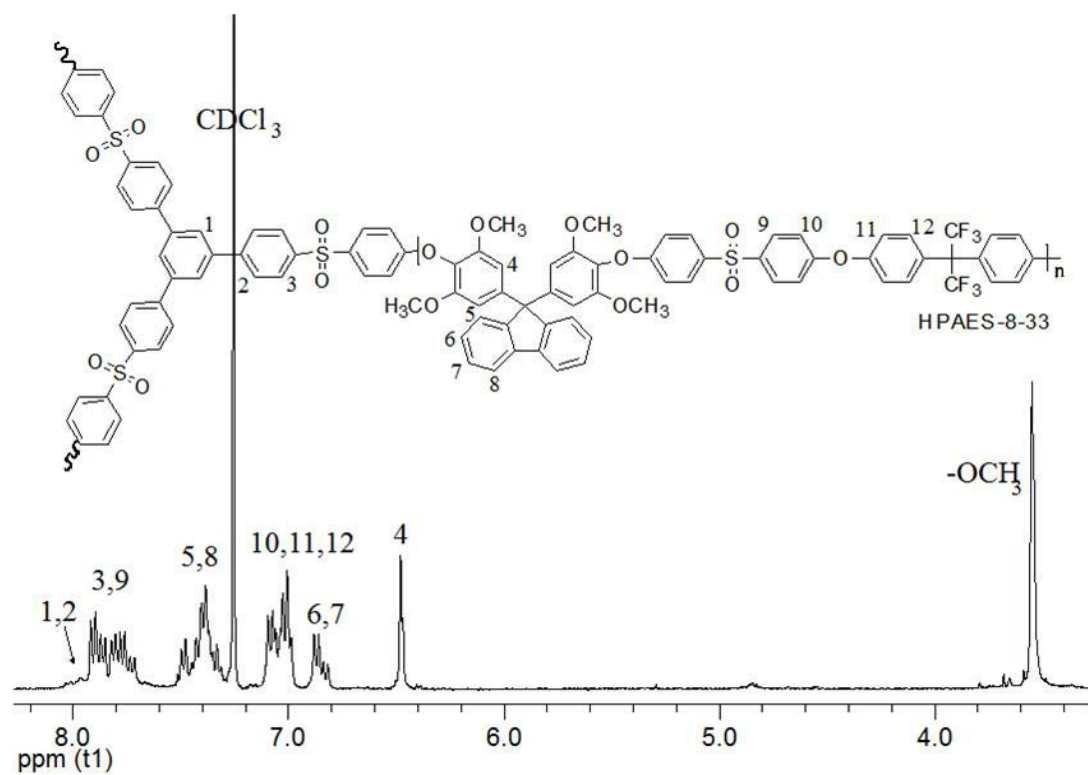

**Fig.S1.** <sup>1</sup>H NMR spectra of MPAES-8-33

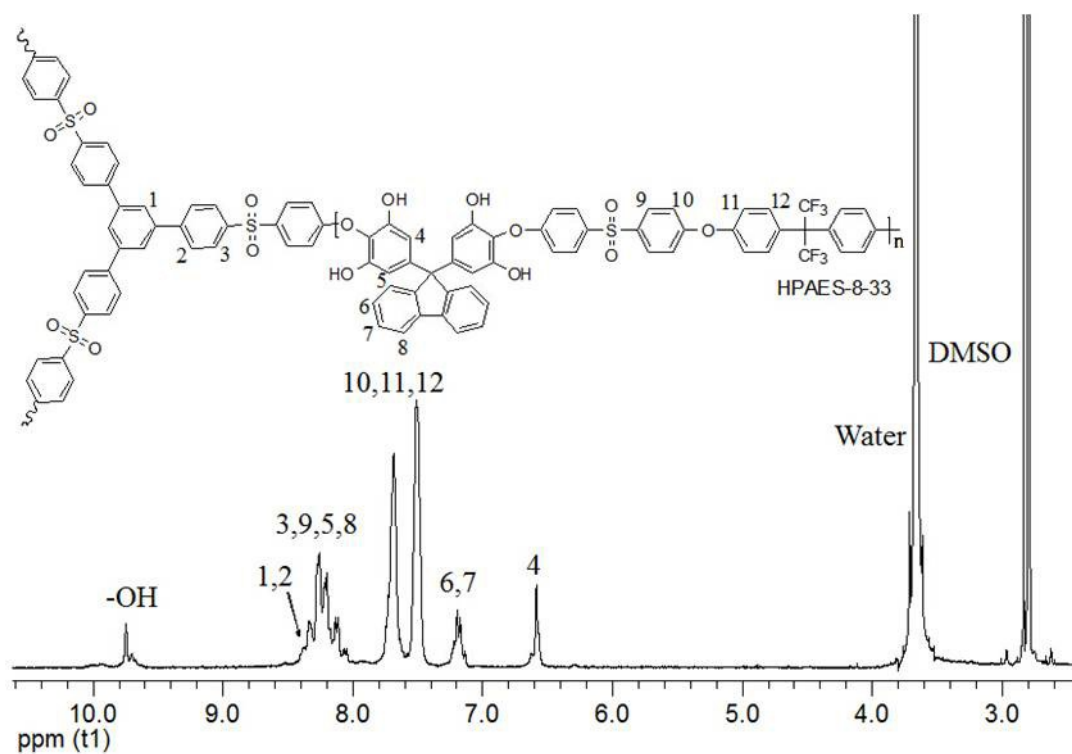

**Fig. S2.** <sup>1</sup>H NMR spectra of HPAES-8-33

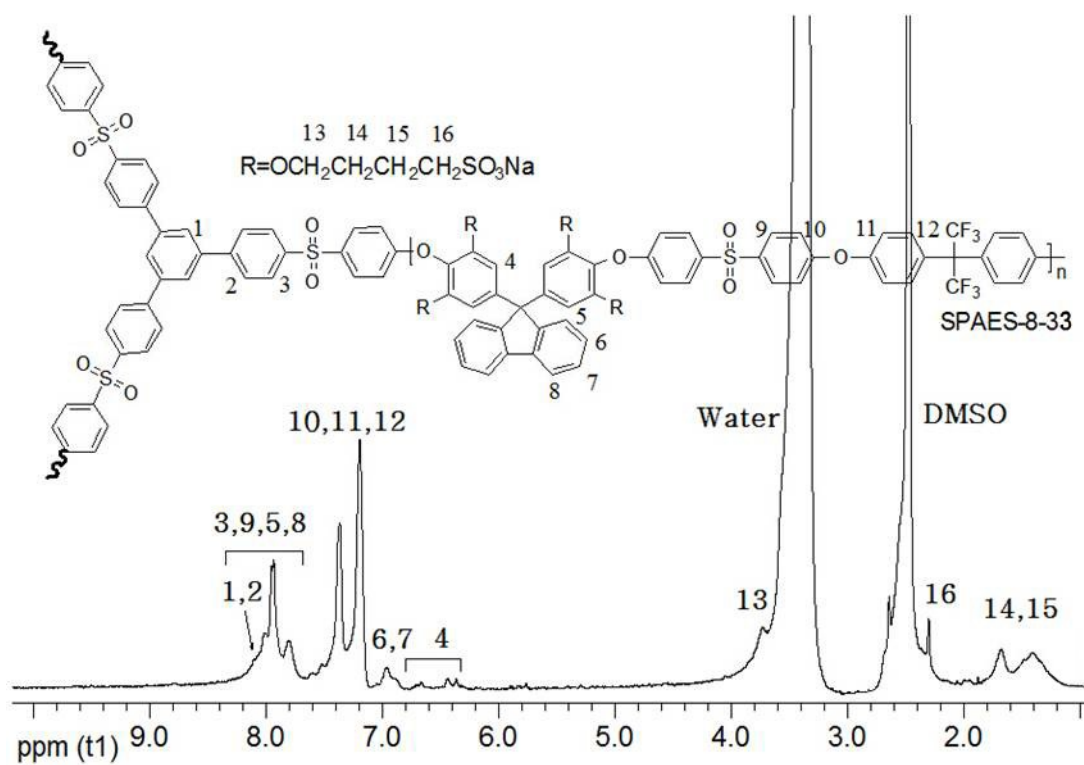

**Fig. S3.** <sup>1</sup>H NMR spectra of SPAES-8-33

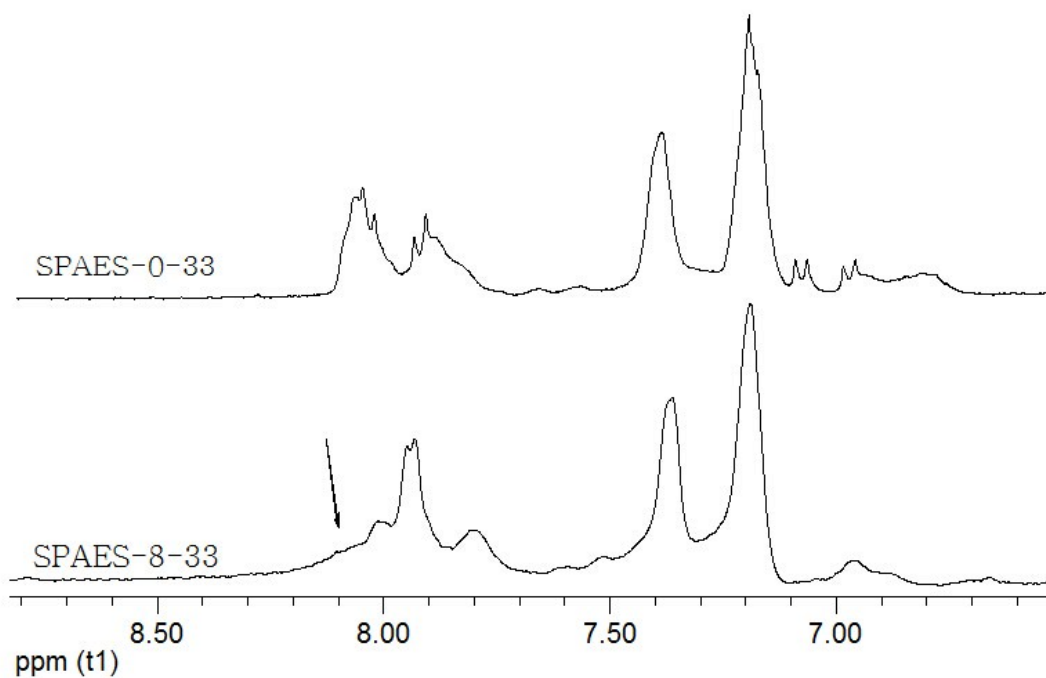

**Fig.S4.** <sup>1</sup>H NMR spectra of SPAES-0-33 and SPAES-8-33
